# Supplementary material
Source: PubMed Central journal article supplement (PMC6291336)
Supplement: supp_the2018-0179_onco12593-sup-0001-Table01.pdf [file supp_the2018-0179_onco12593-sup-0001-Table01.pdf]

Supplemental Table for:

FDA Supplemental Approval: Blinatumomab for treatment of relapsed and refractory precursor B-cell acute lymphoblastic leukemia

Elizabeth Pulte et al.

**Table S1:** Definition of Grouped Terms

| Term                      | Preferred terms included in grouped term                                                                                                                                                                                                                                                                    |
|---------------------------|-------------------------------------------------------------------------------------------------------------------------------------------------------------------------------------------------------------------------------------------------------------------------------------------------------------|
| Abdominal pain            | Abdominal pain, abdominal pain lower, abdominal pain upper, gastrointestinal pain, abdominal discomfort                                                                                                                                                                                                     |
| Anemia                    | Anaemia, erythropenia, haematocrit decreased, haemoglobin decreased, red blood cell count decreased                                                                                                                                                                                                         |
| Cytokine release syndrome | Cytokine release syndrome, cytokine storm, macrophage activation                                                                                                                                                                                                                                            |
| Depression                | Depressed mood, depression, depression suicidal, major depression, completed suicide, suicide attempt, adjustment disorder with depressed mood, adjustment disorder with mixed anxiety and depression, agitated depression, Columbia suicide severity rating abnormal, suicidal ideation, suicidal behavior |
| Device related infection  | Device related infection, device related sepsis                                                                                                                                                                                                                                                             |
| Diarrhea                  | Colitis, diarrhea, diarrhea infectious, enteritis, gastroenteritis, gastroenteritis viral, neutropenic colitis, viral diarrhea                                                                                                                                                                              |
| Encephalopathy            | Altered state of consciousness, cognitive disorder, confusional state, depressed level of consciousness, disturbance in attention, encephalopathy, lethargy, leukoencephalopathy, memory                                                                                                                    |

|                      |                                                                                                                                                                                                                                                                                       |
|----------------------|---------------------------------------------------------------------------------------------------------------------------------------------------------------------------------------------------------------------------------------------------------------------------------------|
|                      | impairment, mental status changes, somnolence                                                                                                                                                                                                                                         |
| Headache             | Cluster headache, headache, sinus headache, tension headache                                                                                                                                                                                                                          |
| Mucosal inflammation | Glossitis, mucosal inflammation, pharyngeal inflammation, stomatitis                                                                                                                                                                                                                  |
| Neutropenia          | Agranulocytosis, febrile neutropenia, granulocytopenia, neutropenia, neutrophil count decreased                                                                                                                                                                                       |
| Pyrexia              | Pyrexia, body temperature increased                                                                                                                                                                                                                                                   |
| Rash                 | Dermatitis, dermatitis contact, erythema, rash, rash erythematous, rash generalized, rash macular, rash maculopapular, rash macrovascular, rash papular, rash vesicular, skin exfoliation, skin reaction, toxic skin eruption                                                         |
| Sepsis               | Abdominal sepsis, bacteremia, bacterial sepsis, candida sepsis, device related sepsis, enterococcal sepsis, Enterobacter sepsis, Escherichia sepsis, fungal sepsis, neutropenic sepsis, post-procedural sepsis, pulmonary sepsis, sepsis, sepsis syndrome, septic shock, viral sepsis |
| Seizure              | Atonic seizures, partial seizures, partial seizures with secondary generalization, seizure, simple partial seizures                                                                                                                                                                   |
| Sensory issues       | Anosmia, bruxism, carpal tunnel syndrome, dysaesthesia, dysgeusia, hemianopia, hyperaesthesia, hypoaesthesia, neuralgia, paresthesia, peripheral sensory neuropathy, sciatica, sensory disturbance, trigeminal neuralgia, visual field defect                                         |
| Syncope              | Dizziness, presyncope, syncope                                                                                                                                                                                                                                                        |

Thrombocytopenia

Platelet count decreased, thrombocytopenia

Tremor

Action tremor, essential tremor, intention tremor, resting tremor, tremor

---
